# Supplementary figures and images for: Continental-scale genomic analysis suggests shared post-admixture adaptation in the Americas
Source: PubMed Central journal article supplement — Hum Mol Genet. 2021 Jul 1;30(22):2123–34. doi: 10.1093/hmg/ddab177 (PMC8561420; doi:10.1093/hmg/ddab177), 2021-07-01

False-positive rate

0.00

0.01

0.02

AFR

EUR

ASIA

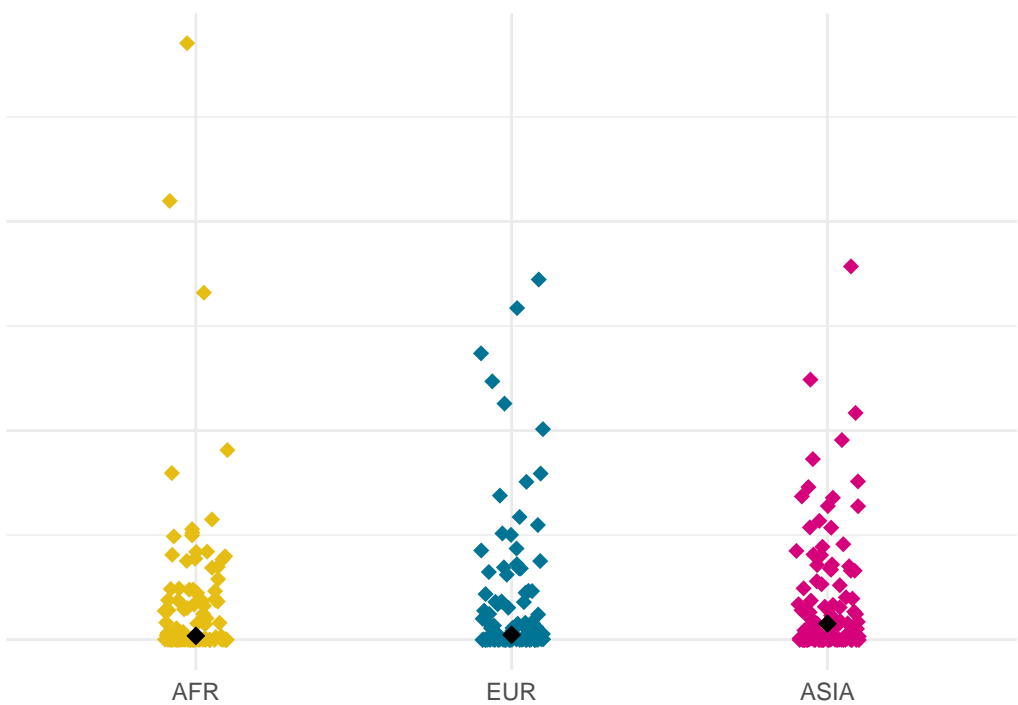

Supplement: supplementaryfigure1_ddab177.pdf [file supplementaryfigure1_ddab177.pdf]

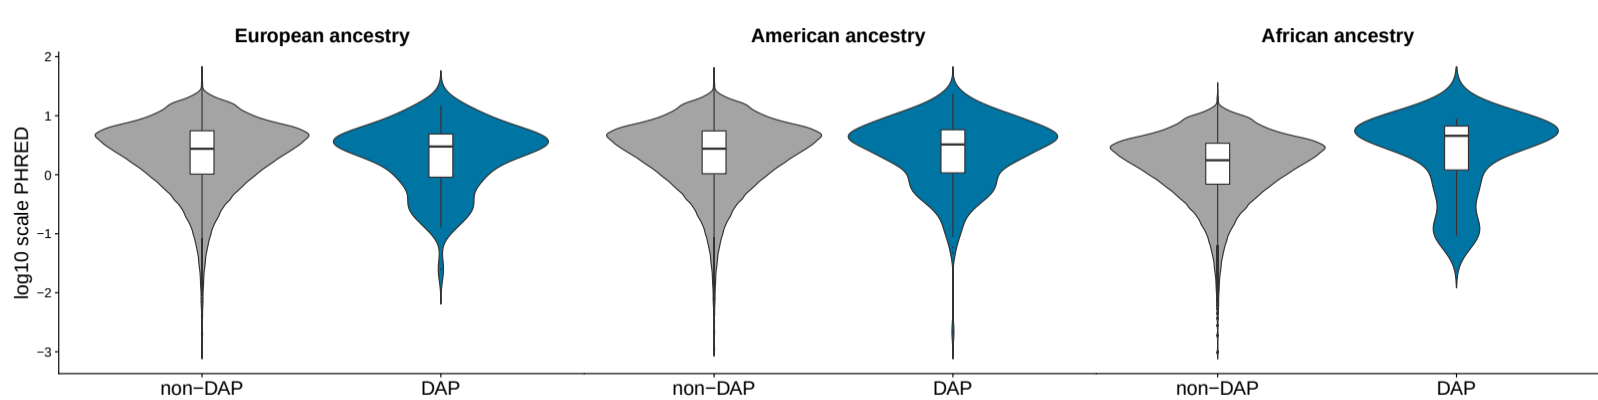

Supplement: supplementaryfigure2_ddab177.pdf [file supplementaryfigure2_ddab177.pdf]

## A. European ancestry

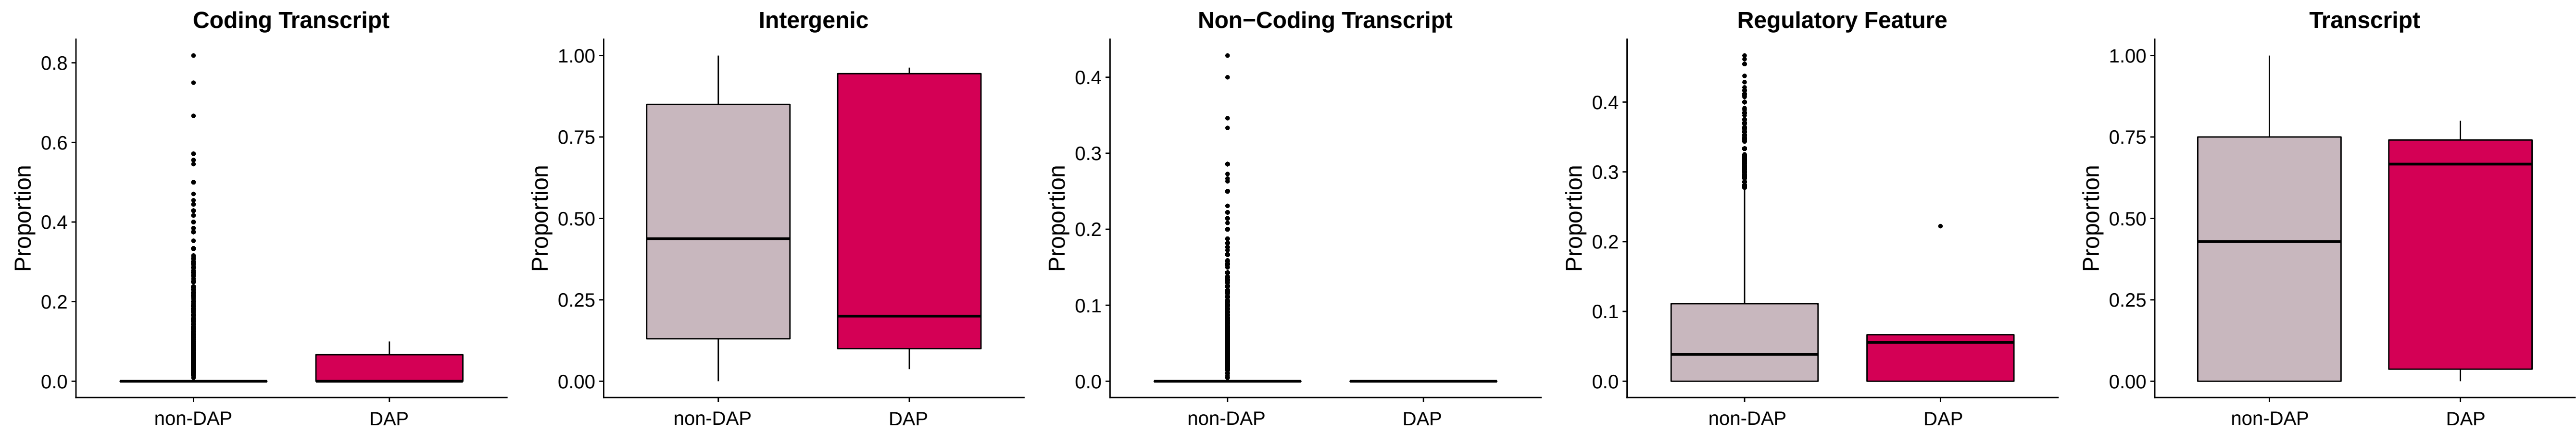

## B. American ancestry

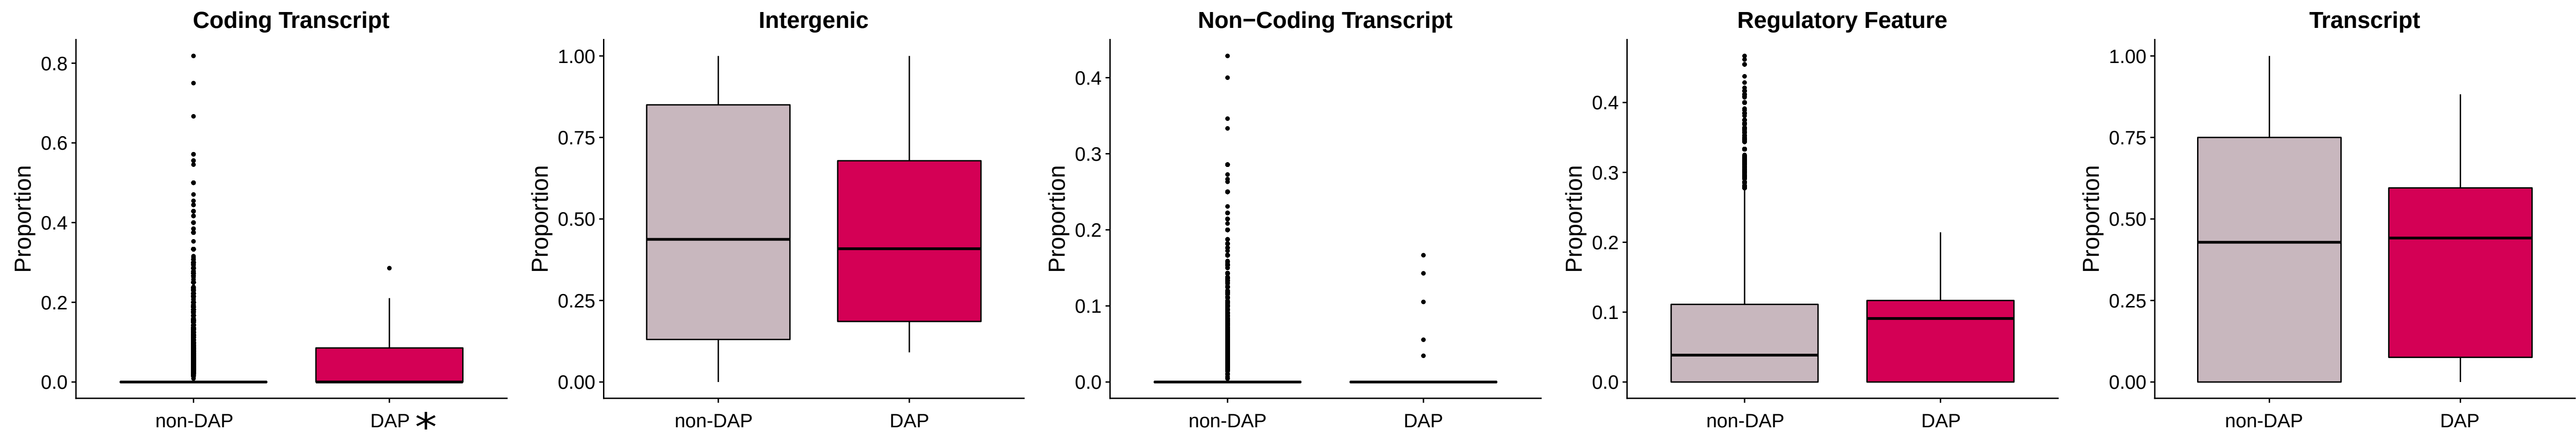

## C. African ancestry

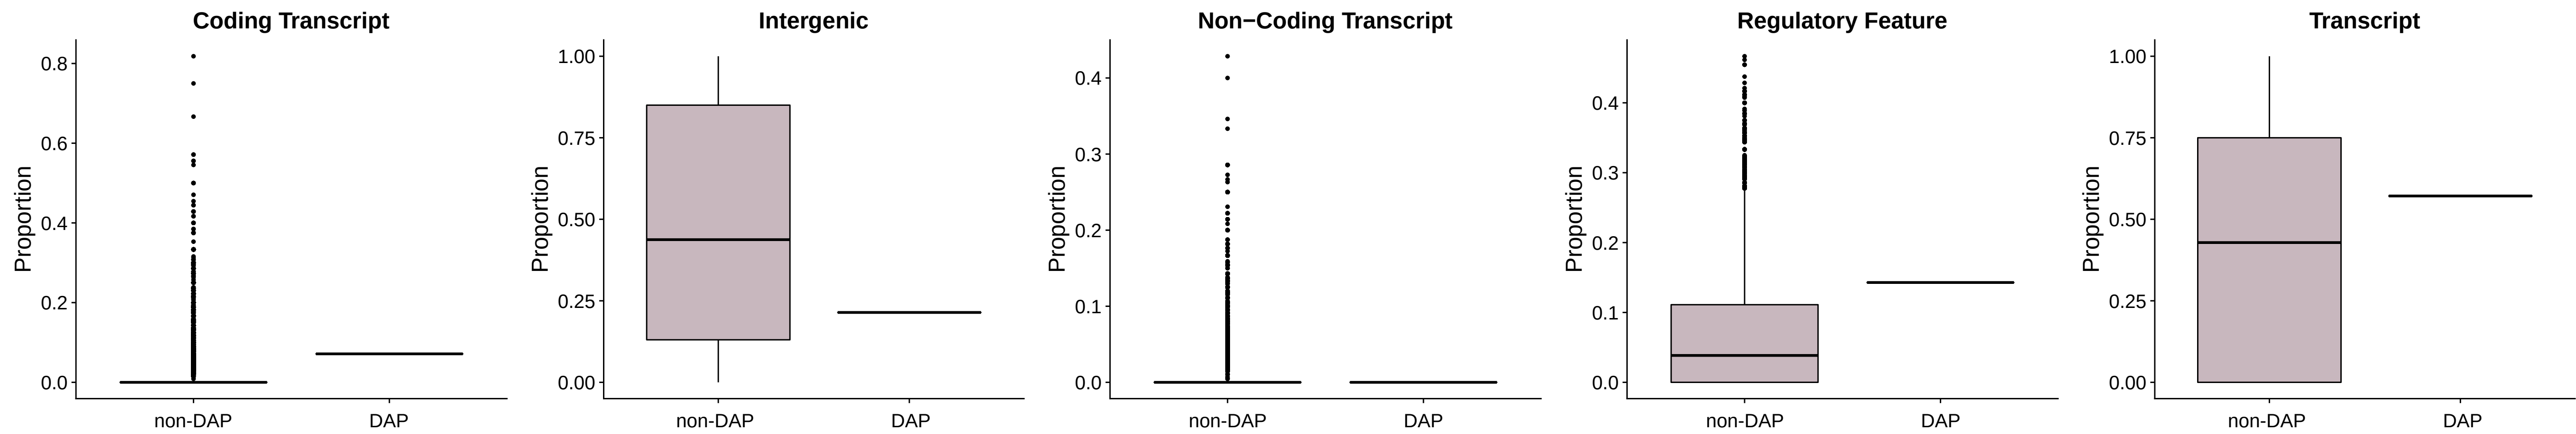

Supplement: supplementaryfigure3_ddab177.pdf [file supplementaryfigure3_ddab177.pdf]
